# Supplementary material for: Thermostability and Immunogenicity of Genotype II Avian Orthoavulavirus (AOaV-1) Isolates from Duck (Anas platyrhynchos) and Parrot (Eclectusroratus)
Source: MDPI journal article supplement (doi:10.3390/v14112528), 2022-11-15
Supplement: s1 [file s1]

## Supplementary Materials

Table S1: ANOVA of serum antibody titers in chicks against NDV isolates used for immunization showing the effects of treatment and period

| Source of variation | DF  | SS    | MS      | F         | <i>p</i> value |
|---------------------|-----|-------|---------|-----------|----------------|
| Interaction         | 8   | 48.39 | 6.049   | 449.6**** | $p < 0.0001$   |
| Time                | 4   | 798.8 | 199.7   | 14844**** | $p < 0.0001$   |
| Treatment           | 2   | 117.5 | 58.75   | 4367****  | $p < 0.0001$   |
| Residual            | 135 | 1.816 | 0.01345 |           |                |

\*\*\*\* Highly significant ( $p < 0.0001$ )
